# Supplementary material
Source: ML conference proceedings conference paper supplement (https://openaccess.thecvf.com/content/WACV2024/html/Zhang_Semantic_Transfer_From_WACV_2024_paper.html)
Supplement: Supplementary file 1 [file Zhang_Semantic_Transfer_From_WACV_2024_supplemental.pdf]

# Semantic Transfer from Head to Tail: Enlarging Tail Margin for Long-Tailed Visual Recognition (Supplementary Materials)

Shan Zhang <sup>\*,1</sup>, Yao Ni <sup>\*,1</sup>, Jinhao Du <sup>2</sup>, Yanxia Liu <sup>†,3</sup>, Piotr Koniusz <sup>†,4,1</sup>

<sup>1</sup>Australian National University, <sup>2</sup>Peking University, <sup>3</sup>Beijing Union University, <sup>4</sup>Data61♥CSIRO

<sup>1</sup>firstname.lastname@anu.edu.au, <sup>2</sup>dujinhao02@gmail.com, <sup>3</sup>yanxia.liu@163.com

## A. Sketch Proofs in Section 3

### A.1. Proof of Assumption 1

**Assumption 1.** Assume that after augmentation, the feature  $\tilde{\mathbf{a}}_i^t$  passed to the classifier, which comes from a tail sample  $\mathbf{x}_i^t$ , can be approximately represented by a distribution  $\tilde{\mathbf{a}}_i^t \sim \mathcal{N}(\mathbf{a}_i^t, \Delta \Sigma_{th}^i)$ . Here,  $\mathbf{a}_i^t$  is the feature obtained without augmentation, and  $\Delta \Sigma_{th}^i$  is a positive definite covariance matrix.

**Proof:** For a tail class  $k_t$ , each unaugmented feature  $\mathbf{a}_i^t$  comes from  $\mathcal{N}(\boldsymbol{\mu}_t, \boldsymbol{\Sigma}_t)$ , where  $\boldsymbol{\mu}_t$  and  $\boldsymbol{\Sigma}_t$  represent the mean and covariance for class  $k_t$ . The augmentation operation in Eq. 6 transforms the  $\mathbf{a}^t$  into  $\tilde{\mathbf{a}}^t$ , which follows  $\mathcal{N}(\boldsymbol{\mu}_t, \boldsymbol{\Sigma}_{th})$ , with  $\boldsymbol{\Sigma}_{th}$  being an approximation to the covariance matrix  $\boldsymbol{\Sigma}_h$  (Referring to §A.4, the covariance of augmented tail samples will be close to that of semantically similar head samples under the optimal transformation matrix.). For each  $i$ , there is always a suitable matrix  $\Delta \Sigma_{th}^i$  that ensures augmented features for class  $k_t$  align closely with  $\boldsymbol{\Sigma}_{th}$  or  $\boldsymbol{\Sigma}_h$ . This alignment arises from the synergy of the augmentation method and variations during training, effectively shaping  $\mathbf{a}_i^t$  into  $\tilde{\mathbf{a}}_i^t \sim \mathcal{N}(\mathbf{a}_i^t, \Delta \Sigma_{th}^i)$ .

**Remark:** Assumption 1 posits that under mild assumptions the augmentation naturally shifts  $\mathbf{a}_i^t$  to  $\tilde{\mathbf{a}}_i^t \sim \mathcal{N}(\mathbf{a}_i^t, \Delta \Sigma_{th}^i)$ .

### A.2. Proof of Lemma 2

**Lemma 2.** Given the negative log softmax function, the loss  $L_k$  for samples of class  $k$  without augmentation can be derived as:

$$\begin{aligned} L_k &= \frac{1}{n_k} \sum_{i=1}^{n_k} -\log \frac{e^{\mathbf{w}_k^T \mathbf{a}_i + b_k}}{\sum_{j=1}^K e^{\mathbf{w}_j^T \mathbf{a}_i + b_j}} \\ &= \frac{1}{n_k} \sum_{i=1}^{n_k} \log \left( 1 + \sum_{j \neq k} e^{d_i \|\mathbf{w}_j - \mathbf{w}_k\|_2 \cdot \text{sign}(\cos \theta_{i,jk})} \right) \end{aligned} \quad (12)$$

Drawing upon [37], the decision boundary between class  $j$  and class  $k$  can be formulated as:  $(\mathbf{w}_j - \mathbf{w}_k)^T \mathbf{a} + (b_j - b_k) = 0$ .  $d_i$  is the distance from point  $\mathbf{a}_i$  to the decision boundary,  $\theta_{i,jk}$  denotes the angle between  $\mathbf{w}_j - \mathbf{w}_k$  and  $\mathbf{a}_i$ .

---

<sup>\*</sup>Equal contribution. <sup>†</sup>Corresponding author.

**Proof:**

$$\begin{aligned}
L_k &= \frac{1}{n_k} \sum_{i=1}^{n_k} -\log \frac{e^{\mathbf{w}_k^T \mathbf{a}_i + b_k}}{\sum_{j=1}^K e^{\mathbf{w}_j^T \mathbf{a}_i + b_j}} \\
&= \frac{1}{n_k} \sum_{i=1}^{n_k} \log \frac{\sum_{j=1}^K e^{\mathbf{w}_j^T \mathbf{a}_i + b_j}}{e^{\mathbf{w}_k^T \mathbf{a}_i + b_k}} \\
&= \frac{1}{n_k} \sum_{i=1}^{n_k} \log \left( 1 + \sum_{j \neq k} e^{(\mathbf{w}_j - \mathbf{w}_k)^T \mathbf{a}_i + (b_j - b_k)} \right) \\
&= \frac{1}{n_k} \sum_{i=1}^{n_k} \log \left( 1 + \sum_{j \neq k} e^{d_i \|\mathbf{w}_j - \mathbf{w}_k\|_2 \cdot \text{sign}(\cos \theta_{i,jk})} \right)
\end{aligned} \tag{13}$$

To derive Eq. 13, let us inspect the geometric representation. Focus on the distance  $d_i$  from  $\mathbf{a}_i$  to the decision boundary  $(\mathbf{w}_j - \mathbf{w}_k)^T \mathbf{a}_i + (b_j - b_k) = 0$ :

$$d_i = \frac{|(\mathbf{w}_j - \mathbf{w}_k)^T \mathbf{a}_i + (b_j - b_k)|}{\|\mathbf{w}_j - \mathbf{w}_k\|_2} \tag{14}$$

For orientation, when  $\mathbf{a}_i$  and  $\mathbf{w}_k$  lie on the same side of the decision boundary, the sign of cosine of the angle between  $(\mathbf{w}_j - \mathbf{w}_k)$  and  $\mathbf{a}_i$  is given by  $\text{sign}(\cos \theta_{i,jk}) = -1$ . In the opposite scenario, the sign would be positive. Integrating this insight with Eq. 14, we deduce:

$$(\mathbf{w}_j - \mathbf{w}_k)^T \mathbf{a}_i + (b_j - b_k) = d_i \|\mathbf{w}_j - \mathbf{w}_k\|_2 \cdot \text{sign}(\cos \theta_{i,jk}) \tag{15}$$

This directly gives rise to Eq. 13.

### A.3. Proof of Theorem 1

**Theorem 1.** Assume Assumption 1 holds when using our augmentation. The loss function  $L_k^t$  for tail class  $k$  is:

$$\begin{aligned}
L_k^t &= \frac{1}{n_k} \sum_{i=1}^{n_k} \mathbb{E}_{\tilde{\mathbf{a}}_i^t} \left[ -\log \frac{e^{\mathbf{w}_k^T \tilde{\mathbf{a}}_i^t + b_k}}{\sum_{j=1}^K e^{\mathbf{w}_j^T \tilde{\mathbf{a}}_i^t + b_j}} \right] \\
&\leq \frac{1}{n_k} \sum_{i=1}^{n_k} \log \left( 1 + \sum_{j \neq k} \beta_{jk}^i e^{d_i \|\mathbf{w}_j - \mathbf{w}_k\|_2 \cdot \text{sign}(\cos \theta_{i,jk})} \right)
\end{aligned} \tag{16}$$

where  $\beta_{jk}^i = e^{\frac{1}{2}(\mathbf{w}_j - \mathbf{w}_k)^T \Delta \Sigma_{th}^i (\mathbf{w}_j - \mathbf{w}_k)}$ . Furthermore,

$$\beta_{jk}^i = \exp \left( \frac{1}{2} \mathbf{v}_{jk}^i{}^T \mathbf{\Lambda}^i \mathbf{v}_{jk}^i \right) > 1 \tag{17}$$

where  $\mathbf{V}^i \mathbf{\Lambda}^i \mathbf{V}^i{}^T = \Delta \Sigma_{th}^i$  and  $\mathbf{v}_{jk}^i = \mathbf{V}^i{}^T (\mathbf{w}_j - \mathbf{w}_k)$ .

**Proof of Eq. 16:**

$$\begin{aligned}
L_k^t &= \frac{1}{n_k} \sum_{i=1}^{n_k} \mathbb{E}_{\tilde{\mathbf{a}}_i^t} \left[ -\log \frac{e^{\mathbf{w}_k^T \tilde{\mathbf{a}}_i^t + b_k}}{\sum_{j=1}^K e^{\mathbf{w}_j^T \tilde{\mathbf{a}}_i^t + b_j}} \right] \\
&= \frac{1}{n_k} \sum_{i=1}^{n_k} \mathbb{E}_{\tilde{\mathbf{a}}_i^t} \left[ \log \left( 1 + \sum_{j \neq k} e^{(\mathbf{w}_j - \mathbf{w}_k)^T \tilde{\mathbf{a}}_i^t + (b_j - b_k)} \right) \right] \\
&\leq \frac{1}{n_k} \sum_{i=1}^{n_k} \log \left( 1 + \sum_{j \neq k} \mathbb{E}_{\tilde{\mathbf{a}}_i^t} \left[ e^{(\mathbf{w}_j - \mathbf{w}_k)^T \tilde{\mathbf{a}}_i^t + (b_j - b_k)} \right] \right) \tag{18}
\end{aligned}$$

$$= \frac{1}{n_k} \sum_{i=1}^{n_k} \log \left( 1 + \sum_{j \neq k} e^{(\mathbf{w}_j - \mathbf{w}_k)^T \mathbf{a}_i^t + (b_j - b_k) + \frac{1}{2} (\mathbf{w}_j - \mathbf{w}_k)^T \Delta \Sigma_{th} (\mathbf{w}_j - \mathbf{w}_k)} \right) \tag{19}$$

$$\begin{aligned}
&= \frac{1}{n_k} \sum_{i=1}^{n_k} \log \left( 1 + \sum_{j \neq k} e^{\frac{1}{2} (\mathbf{w}_j - \mathbf{w}_k)^T \Delta \Sigma_{th}^i (\mathbf{w}_j - \mathbf{w}_k)} \cdot e^{(\mathbf{w}_j - \mathbf{w}_k)^T \mathbf{a}_i^t + (b_j - b_k)} \right) \\
&= \frac{1}{n_k} \sum_{i=1}^{n_k} \log \left( 1 + \sum_{j \neq k} \beta_{jk} e^{(\mathbf{w}_j - \mathbf{w}_k)^T \mathbf{a}_i^t + (b_j - b_k)} \right) \\
&= \frac{1}{n_k} \sum_{i=1}^{n_k} \log \left( 1 + \sum_{j \neq k} \beta_{jk} e^{d_i \|\mathbf{w}_j - \mathbf{w}_k\|_2 \cdot \text{sign}(\cos \theta_{i,k,j})} \right). \tag{20}
\end{aligned}$$

In the above derivation, the inequality Eq. 18 is a direct consequence of Jensen's inequality  $\mathbb{E}[\log X] \leq \log \mathbb{E}[X]$ . Eq. 19 is obtained by leveraging the moment-generating function  $\mathbb{E}[e^{tX}] = e^{t\mu + \frac{1}{2}\sigma^2 t^2}$  where  $X \sim \mathcal{N}(\mu, \sigma^2)$ , and the fact that  $(\mathbf{w}_j - \mathbf{w}_k)^T \tilde{\mathbf{a}}_i^t + (b_j - b_k)$  is a Gaussian random variable drawn from  $\mathcal{N}\left((\mathbf{w}_j - \mathbf{w}_k)^T \mathbf{a}_i^t + (b_j - b_k), (\mathbf{w}_j - \mathbf{w}_k)^T \Delta \Sigma_{th}^i (\mathbf{w}_j - \mathbf{w}_k)\right)$ . Lastly, Eq. 20 is derived by incorporating Eq. 15.

**Proof of Eq. 17:** Performing SVD on the positive definite symmetric covariance matrix  $\Delta \Sigma_{th}^i$ , we obtain  $\Delta \Sigma_{th}^i = \mathbf{V}^i \mathbf{\Lambda}^i \mathbf{V}^{iT}$ , where  $\mathbf{V}^i$  represents the eigenvectors and  $\mathbf{\Lambda}^i$  is the diagonal matrix of eigenvalues. By incorporating  $\mathbf{w}_j - \mathbf{w}_k$  and  $\mathbf{V}^i$  into a single term, we define  $\mathbf{v}_{jk}^i = \mathbf{V}^{iT} (\mathbf{w}_j - \mathbf{w}_k)$ . On deriving  $\beta_{jk}^i$ , we get:

$$\begin{aligned}
\beta_{jk}^i &= e^{\frac{1}{2} (\mathbf{w}_j - \mathbf{w}_k)^T \Delta \Sigma_{th}^i (\mathbf{w}_j - \mathbf{w}_k)} \\
&= e^{\frac{1}{2} (\mathbf{w}_j - \mathbf{w}_k)^T \mathbf{V}^i \mathbf{\Lambda}^i \mathbf{V}^{iT} (\mathbf{w}_j - \mathbf{w}_k)} \\
&= e^{\frac{1}{2} (\mathbf{V}^{iT} (\mathbf{w}_j - \mathbf{w}_k))^T \mathbf{\Lambda}^i (\mathbf{V}^{iT} (\mathbf{w}_j - \mathbf{w}_k))} \\
&= e^{\frac{1}{2} \mathbf{v}_{jk}^{iT} \mathbf{\Lambda}^i \mathbf{v}_{jk}^i}
\end{aligned}$$

Let  $v_c$  be the  $c^{\text{th}}$  element of  $\mathbf{v}_{jk}^i$  and  $\lambda_c \geq 0$  be the  $c^{\text{th}}$   $\text{diag}(\mathbf{\Lambda}^i)$ , we have:

$$\beta_{jk}^i = e^{\frac{1}{2} \sum_c v_c^2 \lambda_c} > e^0.$$

For any non-zero vector  $\mathbf{w}$  and a positive definite matrix  $\mathbf{A}$ , the result  $\mathbf{w}^T \mathbf{A} \mathbf{w} > 0$  implies  $\beta_{jk}^i > 1$  due to the non-zero vector  $\mathbf{w}_j - \mathbf{w}_k$  and positive definiteness of  $\Delta \Sigma_{th}^i$ . Furthermore, the relationship  $\sum_c \lambda_c = \text{trace}(\mathbf{\Lambda}^i) = \text{trace}(\Delta \Sigma_{th}^i)$  indicates the larger the semantic similarities between the head and tail samples, and the more diverse the head class, the greater the value of  $\beta_{jk}^i$ .

#### A.4. Design of transformation matrix

We aim to design a transformation matrix such that the covariance of transformed tail feature  $\mathbf{F}_t$ , aligns closely with the covariance of head samples. The objective is formulated as:

$$\tilde{\mathbf{F}}_t^* = \arg \min_{\tilde{\mathbf{F}}_t} \|\tilde{\mathbf{F}}_t^T \tilde{\mathbf{F}}_t - \mathbf{F}_h^T \mathbf{F}_h\|_F^2 \tag{21}$$

$$s.t. \quad \tilde{\mathbf{F}}_t = \mathbf{T} \mathbf{F}_t. \tag{22}$$

Substituting the constraint from Eq. 22 into Eq. 21, we find optimality at:

$$\mathbf{F}_t^T \mathbf{T}^T \mathbf{T} \mathbf{F}_t = \mathbf{F}_h^T \mathbf{F}_h. \quad (23)$$

Upon applying singular value decomposition (SVD) to  $\mathbf{F}_t$  and  $\mathbf{F}_h$ , yielding  $\mathbf{V}_t \boldsymbol{\Sigma}_t \mathbf{V}_t^T$  and  $\mathbf{V}_h \boldsymbol{\Sigma}_h \mathbf{V}_h^T$  and insert them into Eq. 23, a solution set emerges:

$$\mathbf{T} = (\mathbf{V}_h \boldsymbol{\Sigma}_h^{\frac{1}{2}} \mathbf{V}_h^T) \mathbf{U} (\mathbf{V}_t \boldsymbol{\Sigma}_t^{-\frac{1}{2}} \mathbf{V}_t^T)^T, \quad (24)$$

where  $\mathbf{U} \in \mathbb{R}^{C \times C}$  is a orthogonal group. Eq. 24 indicates that the transformation matrix,  $\mathbf{T}$ , is influenced by the covariance matrices of both tail and head classes. Empirical validation of this design is presented in Sec. 4.3.
